# Supplementary material for: Heavy metal ion hydrogelation of a self-assembling peptideviacysteinyl chelation
Source: Royal Society of Chemistry journal article supplement (doi:10.1039/c1jm14418a), 2011-11-18

## Supporting Information

| Page | Contents                                                                                                                                                                                                                                                                                                           |
|------|--------------------------------------------------------------------------------------------------------------------------------------------------------------------------------------------------------------------------------------------------------------------------------------------------------------------|
| S2   | <b>Figure S1.</b> HPLC chromatogram of pure reduced MBHP.<br><b>Figure S2.</b> ESI-MS spectrum of pure reduced MBHP.                                                                                                                                                                                               |
| S3   | <b>Figure S3.</b> ESI-MS spectra of metal-MBHP complexes isolated from their respective hydrogels.                                                                                                                                                                                                                 |
| S4   | <b>Figure S4.</b> HPLC chromatogram of pure oxidized MBHP.<br><b>Figure S5.</b> ESI-MS spectrum of pure oxidized MBHP.                                                                                                                                                                                             |
| S5   | <b>Figure S6.</b> CD spectra of 1 wt% metal-MBHP complexes in pH 7.4 buffer (50 mM BTP, 150 mM NaCl) at 25°C in the (A) absence and presence of 1.0 equivalent of (B) MMA, (C) ZnCl <sub>2</sub> , (D) CdCl <sub>2</sub> , (E) HgCl <sub>2</sub> and (E) Pb(NO <sub>3</sub> ) <sub>2</sub> after 1 min and 10 min. |

**Figure S1.** HPLC chromatogram of pure reduced MBHP.

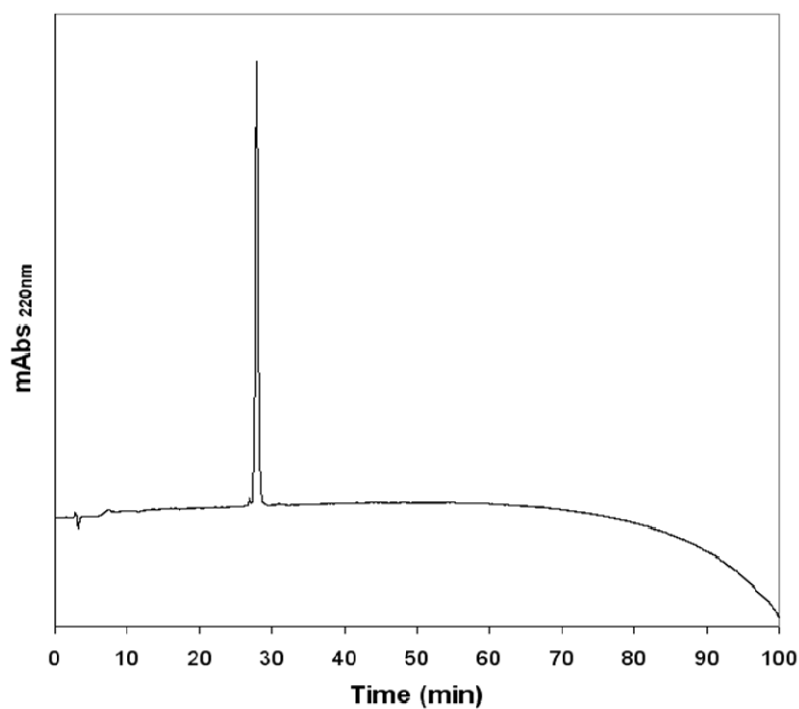

**Figure S2.** ESI-MS spectrum of pure reduced MBHP.

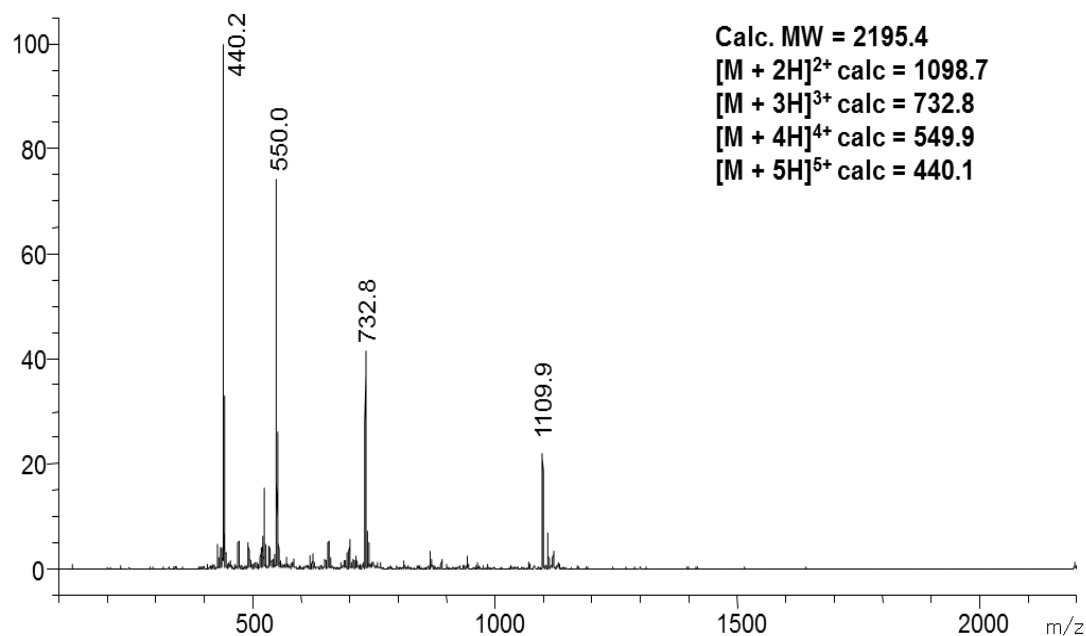

**Figure S3.** ESI-MS spectra of metal-MBHP complexes: (A) MeAs-MBHP, (B) Hg<sup>2+</sup>-MBHP, (C) Cd<sup>2+</sup>-MBHP, (D) Pb<sup>2+</sup>-MBHP, and (E) Zn<sup>2+</sup>-MBHP.

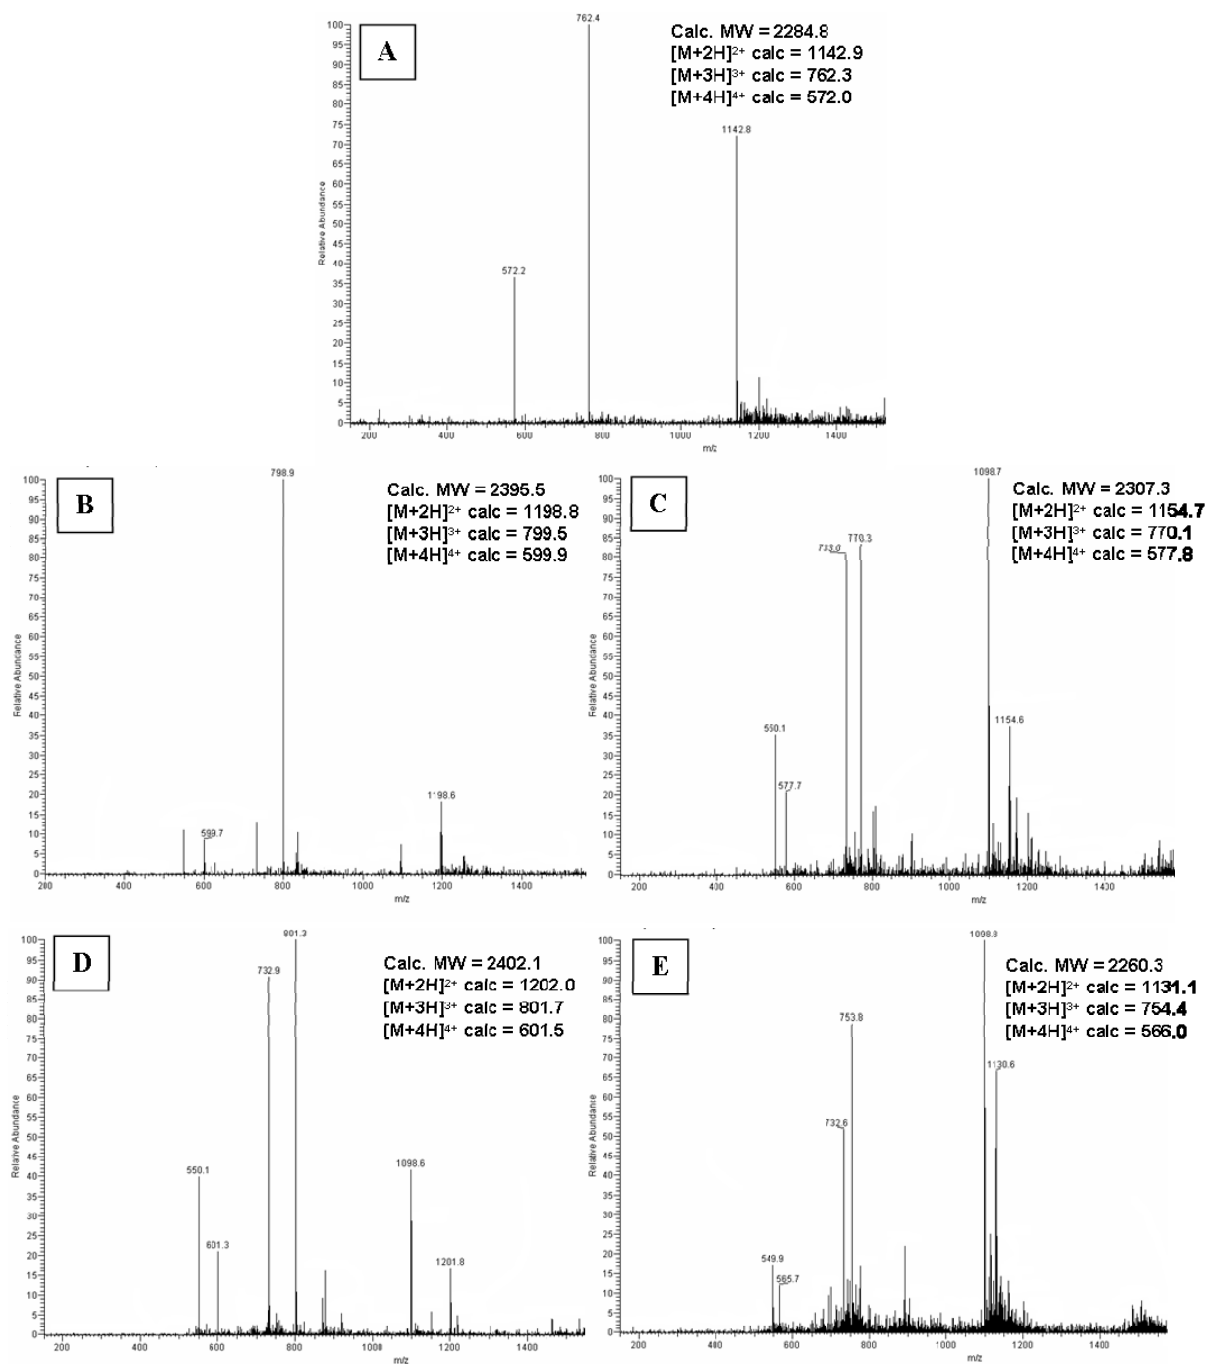

**Figure S4.** HPLC chromatogram of pure oxidized MBHP.

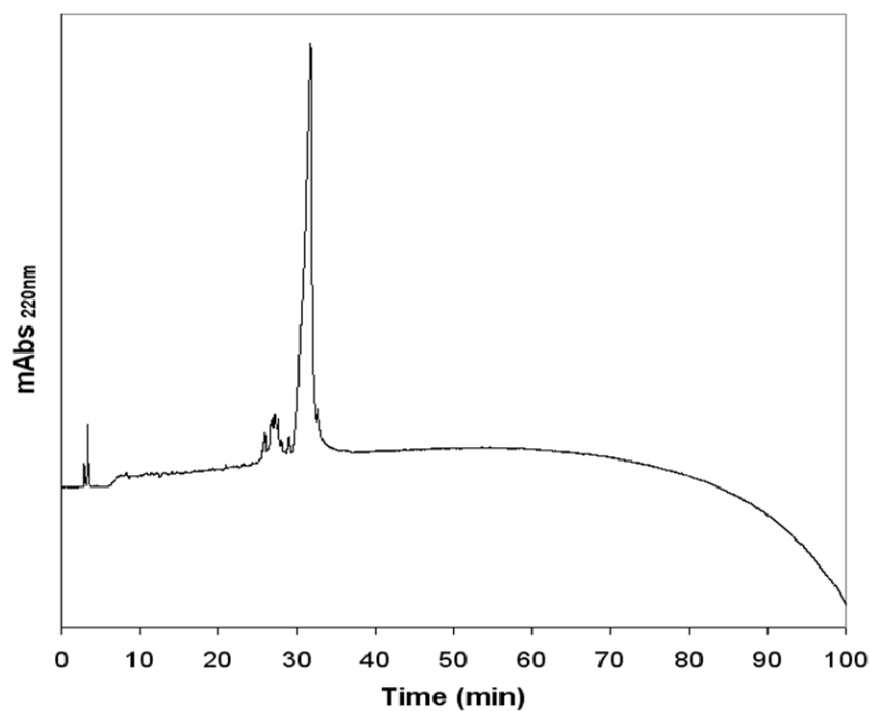

**Figure S5.** ESI-MS spectrum of pure oxidized MBHP.

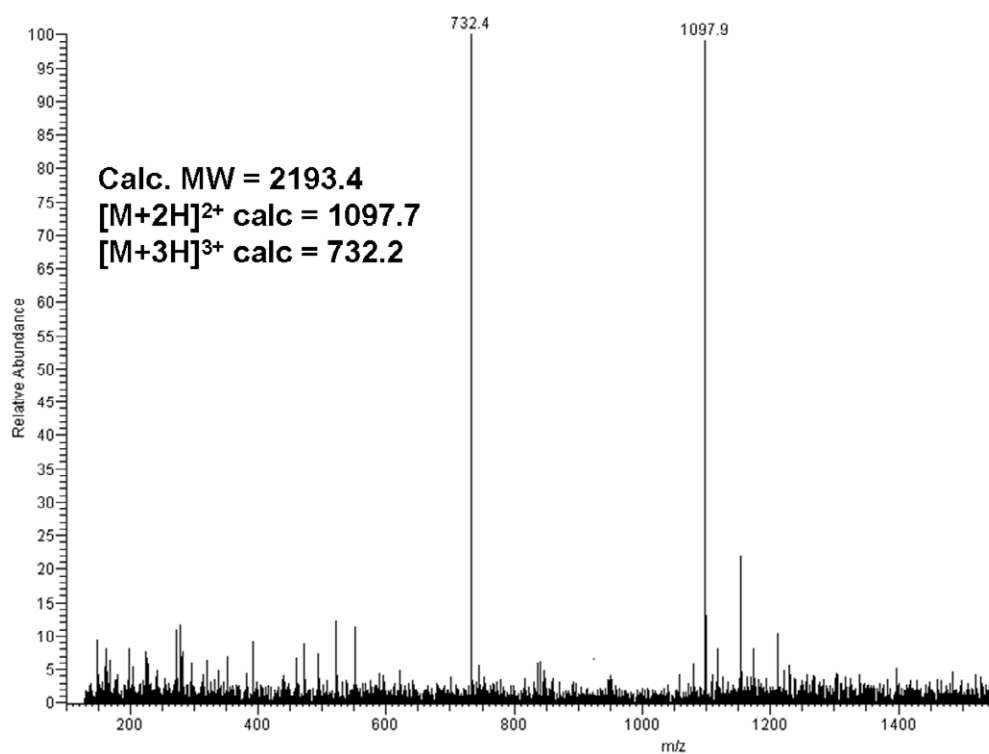

**Figure S6.** CD spectra of 1 wt% metal-MBHP complexes in pH 7.4 buffer (50 mM BTP, 150 mM NaCl) at 25°C in the (A) absence and presence of 1.0 equivalent of (B) MMA, (C) ZnCl<sub>2</sub>, (D) CdCl<sub>2</sub>, (E) HgCl<sub>2</sub> and (F) Pb(NO<sub>3</sub>)<sub>2</sub> after 1 min and 10 min.

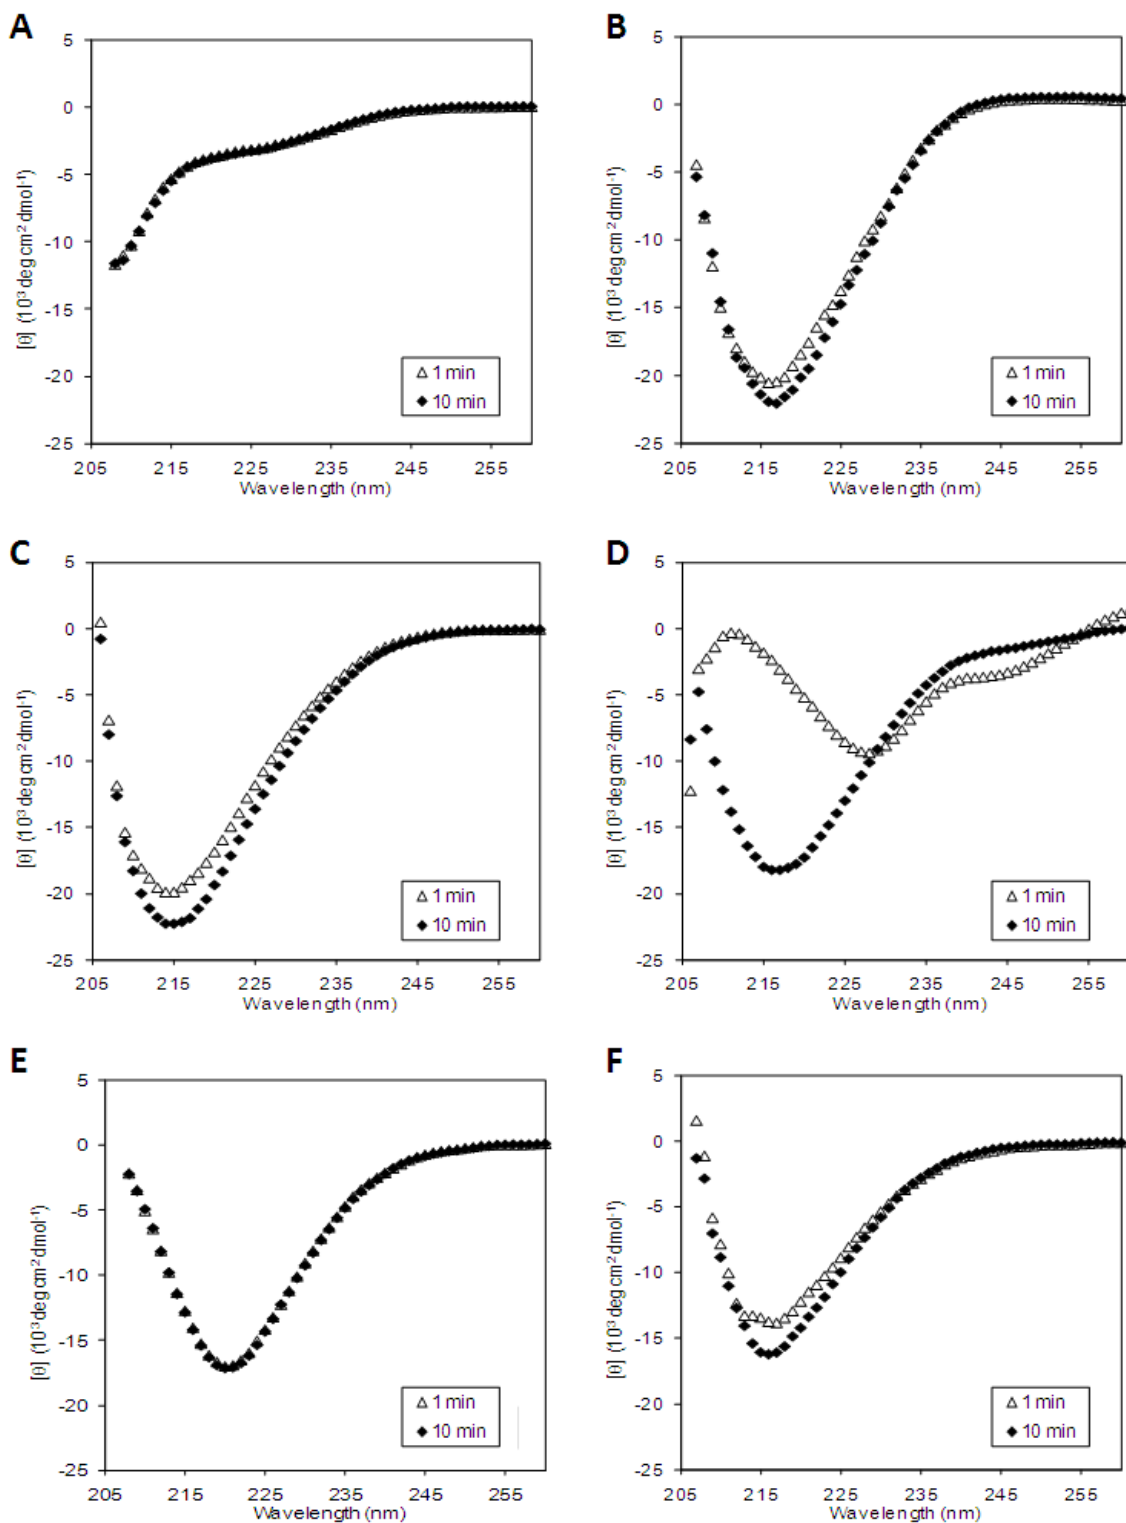

Supplement: c1jm14418a.pdf [file c1jm14418a.pdf]
